# Supplementary material for: The Effect of Ethical Leadership on Subjective Wellbeing, Given the Moderator Job Satisfaction (A Case Study of Private Hospitals in Mashhad)
Source: Research Square preprint supplement (doi:10.21203/rs.3.rs-27384/v3), 2020-10-15
Supplement: Supplementary file 1 [file eb3c5e094db0b410d3d9692a.pdf]

**Submission**  
**"The Effect of Ethical Leadership on Subjective Wellbeing,  
Given the Moderator Job Satisfaction (A Case Study of Private  
Hospitals in Mashhad)"**

**Results produced by eXtyle\***

Reference checking is done for journal citations. If the journal citation has a PubMed or CrossRef link, it has been validated. If 'Not Checked' is displayed, either the citation could not be identified as a journal citation, or the linking service did not return results. If 'Not Validated' is displayed, the journal citation could not be validated on the linking service.

Summarized Results **Ethical Leadership - MAIN3.docx**

|                             |           |
|-----------------------------|-----------|
| <b>Total Citations</b>      | <b>46</b> |
| <b>Validated and Linked</b> | <b>35</b> |
| <b>Not Checked</b>          | <b>10</b> |
| <b>Not Validated</b>        | <b>1</b>  |

| # | Citation                                                                                                                                                                                                                             | Validation | CrossRef                 |
|---|--------------------------------------------------------------------------------------------------------------------------------------------------------------------------------------------------------------------------------------|------------|--------------------------|
| 1 | Babayi Nadinloyi, K., Sadeghi, H., & Hajloo, N. (2013). Relationship between Job Satisfaction and Employees Mental Health, <i>Procedia - Social and Behavioral Sciences</i> , 84, 293–297.                                           | Validated  | <a href="#">CrossRef</a> |
| 2 | Ben-Hur, S., & Jonsen, K. (2012). Ethical Leadership: Lessons from Moses, <i>Journal of Management Development</i> , 31(9): 962 – 973.                                                                                               | Validated  | <a href="#">CrossRef</a> |
| 3 | Bowling, N. A., Eschleman, K. J., & Wang, Q. (2010). A Meta-Analytic Examination of the Relationship between Job Satisfaction and Subjective Well-being. <i>Journal of Occupational and Organizational Psychology</i> , 83, 915-934. | Validated  | <a href="#">CrossRef</a> |
| 4 | Brown, M. E., & Trevino, L. K. (2006). Ethical Leadership: A Review and Future Directions. <i>Leadership Quart</i> , 17, 595–616.                                                                                                    | Validated  | <a href="#">CrossRef</a> |
| 5 | Brown, M. E., Trevino, L. K., & Harrison, D.A. (2005). Ethical Leadership: A Social Learning Perspective for Construct Development and Testing, <i>Organizational Behavior and Human Decision Processes</i> , 97, 117–134.           | Validated  | <a href="#">CrossRef</a> |
| 6 | Crohan, S. E., Antonucci, T. C, Adelman, P K., & Coleman, L. M. (1989). Job Characteristics and Well-being                                                                                                                           | Validated  | <a href="#">CrossRef</a> |

| #  | Citation                                                                                                                                                                                                                                                                | Validation  | CrossRef                 |
|----|-------------------------------------------------------------------------------------------------------------------------------------------------------------------------------------------------------------------------------------------------------------------------|-------------|--------------------------|
|    | at Midlife: Ethnic and Gender Comparisons. <i>Psychology of Women Quarterly</i> , 13, 223-235.                                                                                                                                                                          |             |                          |
| 7  | Chughtai, A. A. (2015). Creating Safer Workplaces: The Role of Ethical Leadership. <i>Safety Science</i> , 73, 92–98.                                                                                                                                                   | Validated   | <a href="#">CrossRef</a> |
| 8  | Chughtai, A., Byrne, M., & Flood, B. (2015). Linking Ethical Leadership to Employee Well-Being: The Role of Trust in Supervisor, <i>Journal of Business Ethics</i> , 128(3): 653-663.                                                                                   | Validated   | <a href="#">CrossRef</a> |
| 9  | Curhan, J. R., Elfenbein, H. A., & Kilduff, G. J. (2009). Getting off on the Right Foot: Subjective Value versus Economic Value in Predicting Longitudinal Job Outcomes from Job Offer Negotiations. <i>Journal of Applied Psychology</i> , 94, 524-534.                | Validated   | <a href="#">CrossRef</a> |
| 10 | Danna, K., & Griffin, R. W. (1999). Health and Well-being in the Workplace: A Review and Synthesis of the Literature. <i>Journal of Management</i> , 25, 357-384                                                                                                        | Validated   | <a href="#">CrossRef</a> |
| 11 | Demirep, H. (2014). An Investigation of the Relationship between Job and Life Satisfaction among Teachers, <i>Procedia - Social and Behavioral Sciences</i> , 116, 4925 – 4931.                                                                                         | Validated   | <a href="#">CrossRef</a> |
| 12 | Dolan, S. L., & Gosselin, E., (1998). Job Satisfaction and Life Satisfaction: Analysis of a Reciprocal Model with Social Demographic Moderators, <i>Journal of Economics Literature Classification: D23, J20, &amp; J28.</i>                                            | Not Checked | Deleted                  |
| 13 | Donaldson-Feilder, E., Munir, F., & Lewis, R. (2013). Leadership and Employee Well-being. In H. S. Leonard, R. Lewis, A. M. Freedman, & J. Passmore (Eds.), <i>The Wiley-Blackwell Handbook of the Psychology of Leadership, Change and Organizational Development.</i> | Not Checked | Deleted                  |
| 14 | Ehrich, L. C., Harris, J., Klenowski, V., Smeed, J., & Spina, N., (2015). The Centrality of Ethical Leadership, <i>Journal of Educational Administration</i> , 53(2): 197 - 214.                                                                                        | Validated   | <a href="#">CrossRef</a> |
| 15 | Elci, M., Sener, L., Aksoy, S., & Alpan,                                                                                                                                                                                                                                | Validated   | <a href="#">CrossRef</a> |

| #  | Citation                                                                                                                                                                                                                                                                                                              | Validation    | CrossRef      |
|----|-----------------------------------------------------------------------------------------------------------------------------------------------------------------------------------------------------------------------------------------------------------------------------------------------------------------------|---------------|---------------|
|    | L. (2012). The Impact of Ethical Leadership and Leadership Effectiveness on Employees Turnover Intention: The Mediating Role of Work Related Stress. <i>Procedia - Social and Behavioral Sciences</i> , 58, 289 – 297.                                                                                                |               |               |
| 16 | Fisher, C. D. (2000). Mood and emotions while working: Missing pieces of job satisfaction? <i>Journal of Organizational Behavior</i> , 21, 185-202.                                                                                                                                                                   | Validated     | CrossRef      |
| 17 | Grant, A. M., Christianson, M. K., and Price, R. H., (2007). Happiness, health, or relationships? Managerial practices and employee well-being tradeoffs, <i>Academy of Management Perspectives</i> . 21 (3): 51-63.                                                                                                  | Validated     | CrossRef      |
| 18 | Hobfoll, S. (1989). Conservation of resources. <i>American Psychologist</i> , 44, 513-524.                                                                                                                                                                                                                            | Validated     | CrossRef      |
| 19 | Ilies, R., Scott, B. A., & Judge, T. A. (2006). The interactive effects of personal traits and experienced states on intraindividual patterns of citizenship behavior. <i>Academy of Management Journal</i> , 49, 561-575.                                                                                            | Validated     | CrossRef      |
| 20 | Ip, P. K. (2011). Practical Wisdom of Confucian Ethical Leadership: a Critical Inquiry. 30(7/8): 685-696.<br>de Bettignies, H. C., Ip, K., Xuezhu, B., Habisch, A., Lenssen, G., & Ip, P. K. (2011). Practical wisdom of Confucian ethical leadership: A critical inquiry. <i>Journal of Management Development</i> . | Not Validated | Was corrected |
| 21 | Judge, T. A., & Hulin, C. L. (1993). Job satisfaction as a reflection of disposition: A multiple source causal analysis. <i>Organizational Behavior and Human Decision Processes</i> , 56, 388-421.                                                                                                                   | Validated     | CrossRef      |
| 22 | Judge, T. A., & Ilies, R. (2004). Affect and Job Satisfaction: A Study of their Relationship at Work and at Home. <i>Journal of Applied Psychology</i> , 89, 661-673.                                                                                                                                                 | Validated     | CrossRef      |
| 23 | Kalshoven, K. and Den Hartog, D. N., 2009, Ethical Leader Behavior and Leader Effectiveness: The Role of Prototypically and Trust, <i>International Journal of</i>                                                                                                                                                    | Not Checked   | Was corrected |

| #  | Citation                                                                                                                                                                                                                                                                                                                                                                  | Validation  | CrossRef                                                                                                                 |
|----|---------------------------------------------------------------------------------------------------------------------------------------------------------------------------------------------------------------------------------------------------------------------------------------------------------------------------------------------------------------------------|-------------|--------------------------------------------------------------------------------------------------------------------------|
|    | Leadership Studies, Vol. 5 Iss. 2, PP: 102-120. The Role of Prototypically and Trust, International Journal of Leadership Studies, Vol. 5 Iss. 2, PP: 102-120.<br>Kalshoven, K., & Den Hartog, D. N. (2009). Ethical leader behavior and leader effectiveness: The role of prototypicality and trust. <i>International Journal of Leadership Studies</i> , 5(2), 102-120. |             |                                                                                                                          |
| 24 | Kalshoven, k., and Boon, C. (2012). Ethical Leadership, Employee Well-Being, and Helping the Moderating Role of Human Resource Management. <i>Journal of Personnel Psychology</i> , Vol. 11(1):60–68.<br><br>Kalshoven, K., & Boon, C. T. (2012). Ethical leadership, employee well-being, and helping. <i>Journal of Personnel Psychology</i> .                          | Not Checked | <a href="https://doi.org/10.1027/1866-5888/a000056">/doi.org/10.1027/1866-5888/a000056</a><br><br>Checked and corrected  |
| 25 | Kanungo, R. N. (2001). Ethical Values of Transactional and Transformational Leaders. <i>Canadian Journal of Administrative Scirnces</i> , 18, 257-265.                                                                                                                                                                                                                    | Validated   | CrossRef                                                                                                                 |
| 26 | Kim,W.G. and Brymer,R.A., (2011) The effects of ethical leadership on manager job satisfaction, commitment, behavioral outcomes, and firm performance, <i>International Journal of Hospitality Management</i> , 30, 1020– 1026.                                                                                                                                           | Validated   | CrossRef                                                                                                                 |
| 27 | Kuoppala, J., Lamminpaa, A., Lira, J., &Vainio, H. (2008(,Leadership, job well-being, and health effects—A systematic review and a meta-analysis. <i>Journal of Occupational and Environmental Medicine</i> , 50, 904–915.                                                                                                                                                | Validated   | CrossRef                                                                                                                 |
| 28 | Lam, T., Zhang, H., & Baum, T. (2001). An investigation of employee job satisfaction: the case of hotels in Hong Kong. <i>Tourism Management</i> , 22(2), 157-165.                                                                                                                                                                                                        | Validated   | CrossRef                                                                                                                 |
| 29 | Lee, k. H., Choo, S. W. and Sean Hyun, S. (2016). Effects of recovery experiences on hotel employees’ subjectivewell-being, <i>International Journal of Hospitality Management</i> , vol : 52, pp: 1–12.<br><br>Lee, K. H., Choo, S. W., & Hyun, S. S.                                                                                                                    | Not Checked | <a href="https://doi.org/10.1016/j.ijhm.2015.04.002">doi.org/10.1016/j.ijhm.2015.04.002</a><br><br>Checked and corrected |

| #  | Citation                                                                                                                                                                                                                                                                                                                        | Validation  | CrossRef                                                                                         |
|----|---------------------------------------------------------------------------------------------------------------------------------------------------------------------------------------------------------------------------------------------------------------------------------------------------------------------------------|-------------|--------------------------------------------------------------------------------------------------|
|    | (2016). Effects of recovery experiences on hotel employees' subjective well-being. <i>International Journal of Hospitality Management</i> , 52, 1-12.                                                                                                                                                                           |             |                                                                                                  |
| 30 | Loewe,N., Araya-Castillo, L., Thieme, C. and Batista-Foguet, J.M.,2015, Self-employment as a moderator between work and life satisfaction. <i>Academia RevistaLatinoamericana</i> , Vol. 28 No. 2,pp. 213-226                                                                                                                   | Validated   | CrossRef                                                                                         |
| 31 | Mahsud, R., Yukl, G. and Prussia, G., (2010),"Leader empathy, ethical leadership, and relations-oriented behaviors as antecedents of leader-member exchange quality", <i>Journal of Managerial Psychology</i> , Vol. 25, Iss 6, pp. 561 - 577.                                                                                  | Validated   | CrossRef                                                                                         |
| 32 | Mayer, D. M., Aquino, K., Greenbaum, R. L., &Kuenzi, M. (2012). Who displays ethical leadership, and why does it matter? An examination of antecedents and consequences of ethical leadership. <i>Academy of Management Journal</i> , 55(1), 151–171.                                                                           | Validated   | CrossRef                                                                                         |
| 33 | Neubert, M., Carlson, D.S., Kacmar, K.M., Roberts, J., Chonko, L.B., 2009. The virtuous influence of ethical leadership behavior: evidence from the field. <i>Journal of Business Ethics</i> 90 (2), 157–170.                                                                                                                   | Validated   | CrossRef                                                                                         |
| 34 | Pundt, M. L., Wöhrmann, A. M., Deller, J., and Shultz, K. S., (2015) "Differential predictors of post-retirement life and work satisfaction", <i>Journal of Managerial Psychology</i> , Vol. 30 Iss: 2, pp.216 – 231.                                                                                                           | Validated   | CrossRef                                                                                         |
| 35 | Robbins, S. P., & Coulter, M. (1996). <i>Management</i> . Upper Saddle River, NJ: Prentice-Hall.<br><br>Robbins, S. P., & Coulter, M. (2007). <i>Principles of management. Translated by Seyyed Mohammad Arabi and Mohammed Ali Hamid Rafiee and Behrouz Asrari Ershad, Fourth Edition, Tehran: Office of Cultural Studies.</i> | Not Checked | Reference was given to the new version                                                           |
| 36 | Ruiz-Palomino, P., Ruiz-Amaya, C., &Knörr, H. (2011). Employee Organizational Citizenship Behaviour:                                                                                                                                                                                                                            | Not Checked | <a href="https://doi.org/10.1002/cjas.221">doi.org/10.1002/cjas.221</a><br>Checked and corrected |

| #  | Citation                                                                                                                                                                                                                                                                                                                                                                                                                                                                          | Validation  | CrossRef                                                              |
|----|-----------------------------------------------------------------------------------------------------------------------------------------------------------------------------------------------------------------------------------------------------------------------------------------------------------------------------------------------------------------------------------------------------------------------------------------------------------------------------------|-------------|-----------------------------------------------------------------------|
|    | <p>The Direct and Indirect Impact of Ethical Leadership. <i>Canadian Journal of Administrative Sciences / Revue Canadienne des Sciences de l'Administration</i>, 28(3), 244-258.</p> <p>Ruiz-Palomino, P., Ruiz-Amaya, C., &amp; Knörr, H. (2011). Employee organizational citizenship behaviour: The direct and indirect impact of ethical leadership. <i>Canadian Journal of Administrative Sciences/Revue Canadienne des Sciences de l'Administration</i>, 28(3), 244-258.</p> |             |                                                                       |
| 37 | Susskind, A. M., Borchgrevink, C. P, Kacmar, K. M., & Brymer, R. A. (2000). Customer service employees' behavioral intentions and attitudes: An examination of construct validity and a path model. <i>International Journal of Hospitality Management</i> , 19, 53-77.                                                                                                                                                                                                           | Validated   | <a href="#">CrossRef</a>                                              |
| 38 | Tait, M., Padgett, M. Y, & Baldwin, T. T. (1989). Job and life satisfaction: A réévaluation of the strength of the relationship and gender effects as a function of the date of the study. <i>Journal of Applied Psychology</i> , 74, 502-50.                                                                                                                                                                                                                                     | Validated   | <a href="#">CrossRef</a>                                              |
| 39 | Thoresen, C. J., Kaplan, S. A., Barsky, A., Warren, C. R., & de Chermont, K. (2003). The affective underpinnings of job perceptions and attitudes: A meta-analytic review and integration. <i>Psychological Bulletin</i> , 129, 914-945.                                                                                                                                                                                                                                          | Validated   | <a href="#">CrossRef</a>                                              |
| 40 | Tseng, T. A., Chang, D.Y., and Shen, C.C., The relationships between leisure behaviors and life satisfaction of foreign labors in Taiwan – the case of Thai labors, in Joseph S. Chen (ed.) <i>Advances in Hospitality and Leisure</i> , vol(5),pp.25 - 50                                                                                                                                                                                                                        | Not Checked | Deleted                                                               |
| 41 | <p>Valickas, A. and Pilkauskaite-Valickiene, R., (2014), the role of career competencies on subjective well-being, <i>Procedia - Social and Behavioral Sciences</i>, VOL: 116, PP: 2736 – 2740.</p> <p>Valickas, A., &amp; Pilkauskaite-Valickiene, R. (2014). The role of career competencies on subjective well-being. <i>Procedia-Social</i></p>                                                                                                                               | Not Checked | <p>doi: 10.1016/j.sbspro.2014.01.646</p> <p>Checked and corrected</p> |

| #  | Citation                                                                                                                                                                                                                                                                                                                                                                                        | Validation  | CrossRef                                                                                                                                  |
|----|-------------------------------------------------------------------------------------------------------------------------------------------------------------------------------------------------------------------------------------------------------------------------------------------------------------------------------------------------------------------------------------------------|-------------|-------------------------------------------------------------------------------------------------------------------------------------------|
|    | <i>and Behavioral Sciences</i> , 116, 2736-2740.                                                                                                                                                                                                                                                                                                                                                |             |                                                                                                                                           |
| 42 | Van de Vliert, E., & Janssen, O. (2002). 'Better than' performance motives as roots of satisfaction across more and less developed countries. <i>Journal of Cross-Cultural Psychology</i> , 33, 380-397.                                                                                                                                                                                        | Validated   | CrossRef                                                                                                                                  |
| 43 | Van Katwyk, P T., Fox, S., Spector, P E., & Kelloway, E. K. (2000). Using the Job-Related Affective Well-Being Scale (JAWS) to investigate affective responses to work Stressors. <i>Journal of Occupational Health Psychology</i> , 5(2), 219-230.                                                                                                                                             | Validated   | CrossRef                                                                                                                                  |
| 44 | Warr, P., Cook, J., & Wall, T. (1979), Scales for the measurement of some work attitudes and aspects of psychological well-being, <i>Journal of Occupational Psychology</i> , 52, 129-148.<br><br>Warr, P., Cook, J., & Wall, T. (1979). Scales for the measurement of some work attitudes and aspects of psychological well-being. <i>Journal of occupational Psychology</i> , 52(2), 129-148. | Not Checked | <a href="https://doi.org/10.1111/j.2044-8325.1979.tb00448.x">/doi.org/10.1111/j.2044-8325.1979.tb00448.x</a><br><br>Checked and corrected |
| 45 | Wright, T.A. & Cropanzano, R. (2004). The role of psychological well-being in job performance: a fresh look at an age – old quest. <i>Organizational dynamics</i> , 33, 338-351                                                                                                                                                                                                                 | Validated   | CrossRef                                                                                                                                  |
| 46 | Yang, C., (2014), Does Ethical Leadership Lead to Happy Workers? A Study on the Impact of Ethical Leadership, Subjective Well-Being, and Life Happiness in the Chinese Culture, <i>Journal of Business Ethics</i> 123 (3):513-525.                                                                                                                                                              | Validated   | CrossRef                                                                                                                                  |
